# Supplementary material
Source: publisher figshare collection journal article supplement (https://acs.figshare.com/ndownloader/files/9360547)
Supplement: Supplementary file 1 [file 9360547]

**SUPPORTING INFORMATION FOR:**

**Structure and Reactivity of a Model Oxide Supported Silver Nanocluster Catalyst Studied by Near Ambient Pressure X-ray Photoelectron Spectroscopy**

Michael Wagstaffe,<sup>†</sup> Hadeel Hussain,<sup>‡@</sup> Matthew Acres,<sup>‡</sup> Rosemary Jones,<sup>§</sup> Karen

L. Syres,<sup>\*¶</sup> and Andrew G. Thomas<sup>\*‡§</sup>

<sup>†</sup> School of Physics and Astronomy, The University of Manchester, Oxford Road, M13 9PL, UK.

<sup>‡</sup> School of Materials, The Mill, The University of Manchester, Sackville Street, Manchester, M13 9PL, UK.

<sup>§</sup> Photon Science Institute, The University of Manchester, Oxford Road, Manchester, M13 9PL, UK .

<sup>¶</sup> Jeremiah Horrocks Institute, The University of Central Lancashire, Fylde Road, Preston, PR1 2HE, UK.

@Current address: Diamond Light Source, Harwell Science and Innovation Campus, Didcot, Oxfordshire, OX11 0DE, UK.

**E-mail: [andrew.g.thomas@manchester.ac.uk](mailto:andrew.g.thomas@manchester.ac.uk)**

**Figure S1. Core level photoelectron spectra for (a) Ag 3d and (b) Ti 2p**

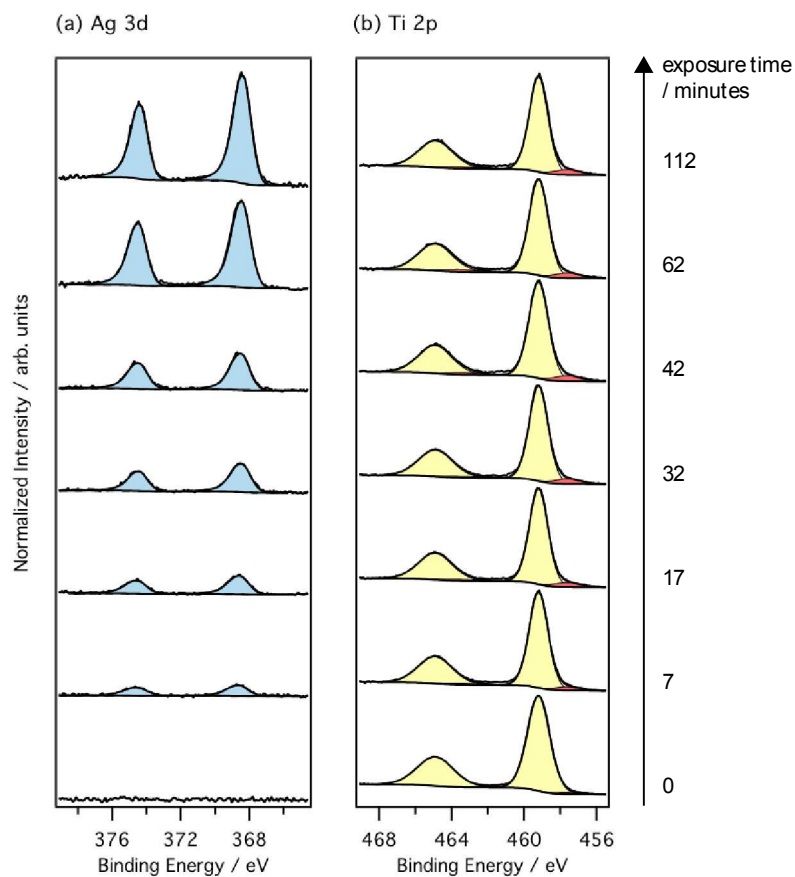

Complete set of Ag 3d XPS core-level spectra (a) with the corresponding Ti 2p core-level spectra (b) ( $h\nu = 1$  keV) showing, from bottom to top, an increasing Ag coverage. The spectra are normalized to the intensity of the Ti 2p  $\text{Ti}^{4+}_{3/2}$  peak at 459.2 eV.

**Figure S2. Enlarged Core level NAP-XPS spectra for O 1s showing components due to H<sub>2</sub>O and CO exposure in more detail.**

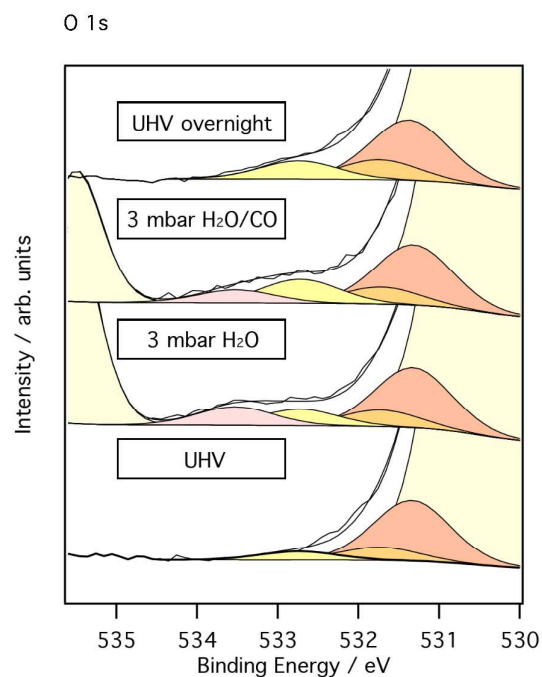

O 1s core- level NAP-XPS spectra recorded at UHV, under exposure to 3 mbar H<sub>2</sub>O, under exposure to 3mbar H<sub>2</sub>O/CO and at UHV the following day. The O 1s spectra highlight the high binding energy shoulder shown in Figure 4 of the main manuscript for clarity.

The assignment of the fitted peaks for the O 1s, Ti 2p and Ag 3d is given below in Table S1. The gas phase O 1s peaks are not included in the table. These occur at 535.5 eV (H<sub>2</sub>O) and 538.2 eV (CO).

**Table S1. Binding energy and assignment of Ti 2p, O 1s and Ag 3d XPS core-level peaks.**

|                      |                                                           | UHV                       |          | 3 mbar H <sub>2</sub> O   |           | 3 mbar<br>H <sub>2</sub> O/CO |           | UHV-next day        |           |
|----------------------|-----------------------------------------------------------|---------------------------|----------|---------------------------|-----------|-------------------------------|-----------|---------------------|-----------|
| Species              | Assignment                                                | BE /<br>eV<br>± 0.1<br>eV | %<br>±1% | BE \<br>eV<br>± 0.1<br>eV | %<br>±1 % | BE / eV<br>± 0.1 eV           | %<br>±1 % | BE \ eV<br>± 0.1 eV | %<br>±1 % |
| Ti 2p <sub>3/2</sub> | Ti <sup>3+</sup>                                          | 457.7                     | 7.3      | 457.7                     | 6.3       | 457.7                         | 6.7       | 457.7               | 5.2       |
|                      | Ti <sup>4+</sup>                                          | 459.2                     | 92.7     | 459.2                     | 93.7      | 459.2                         | 93.3      | 459.2               | 94.8      |
| O 1S                 | TiO <sub>2</sub>                                          | 530.4                     | 88.0     | 530.4                     | 84.3      | 530.4                         | 84.1      | 530.4               | 86.2      |
|                      | O <sub>intrinsic</sub> <sup>1</sup>                       | 531.4                     | 8.8      | 531.3                     | 8.4       | 531.3                         | 8.4       | 531.3               | 8.6       |
|                      | O <sub>defect</sub> /OH <sub>ads</sub>                    | 531.8                     | 1.9      | 531.7                     | 2.3       | 531.7                         | 2.4       | 531.7               | 2.6       |
|                      | O <sub>defect</sub> /CO <sub>ads</sub> /OH <sub>ads</sub> | 532.7                     | 1.2      | 532.7                     | 2.0       | 532.7                         | 3.3       | 532.7               | 2.1       |
|                      | H <sub>2</sub> O                                          | -                         | 0        | 533.5                     | 2.6       | 533.5                         | 1.8       | -                   | 0         |
| Ag 3d <sub>5/2</sub> | Ag <sup>δ+</sup> /Ag(III)                                 | -                         | 0        | -                         | -         | 367.6                         | 5.5       | 367.6               | 0         |
|                      | Ag(0)                                                     | 368.4                     | 100      | 368.4                     | 100       | 368.4                         | 89.0      | 368.4               | 100       |
|                      | Ag(III) <sub>satellite</sub>                              | -                         | 0        | -                         | 0         | 371.4                         | 5.5       | 371.4               | 0         |

- (1) Jackman, M. J.; Thomas, A. G.; Muryn, C. Photoelectron Spectroscopy Study of Stoichiometric and Reduced Anatase TiO<sub>2</sub>(101) Surfaces: The Effect of Subsurface Defects on Water Adsorption at Near-Ambient Pressures. *J. Phys. Chem. C* **2015**, *119*, 13682–13690.
